# Supplementary material for: Quality Marker Discovery and Quality Evaluation of Eucommia ulmoides Pollen Using UPLC-QTOF-MS Combined with a DPPH-HPLC Antioxidant Activity Screening Method
Source: MDPI journal article supplement (doi:10.3390/molecules28135288), 2023-07-07
Supplement: s1 [file s1]

Supplementary material

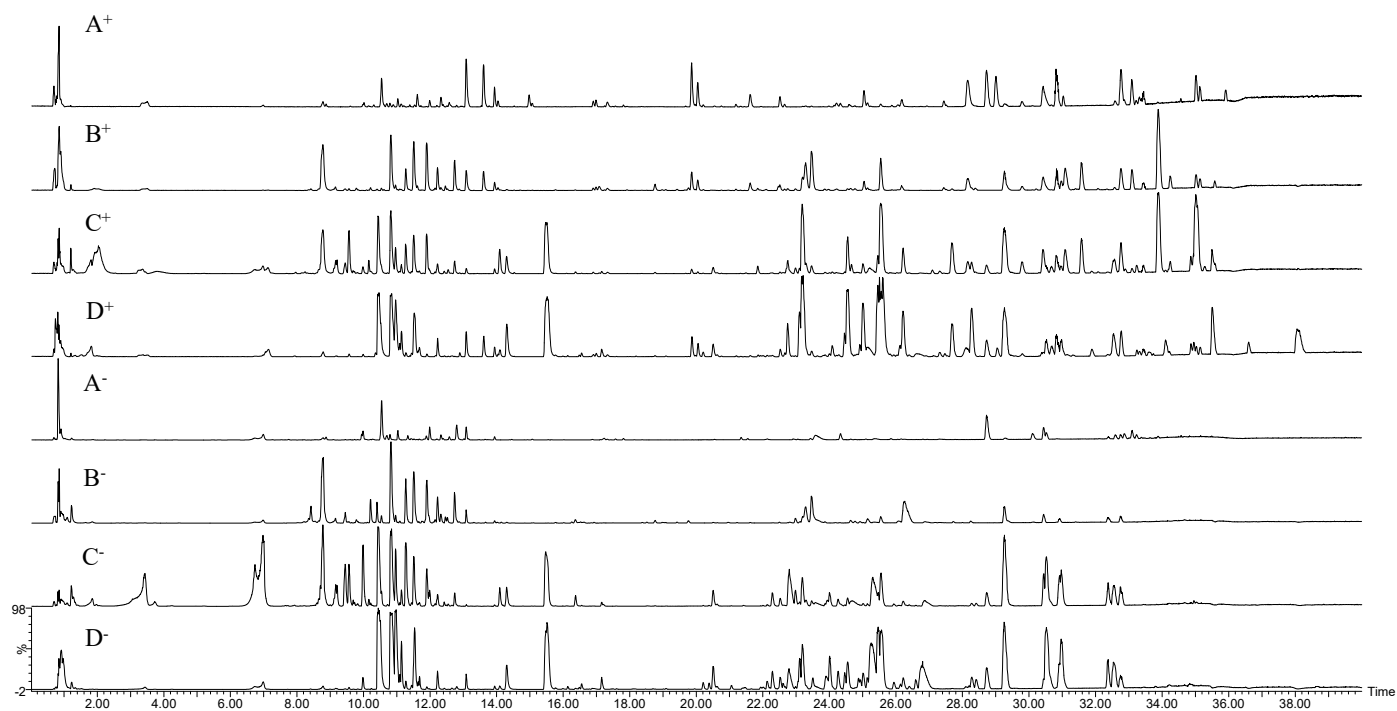

**Figure S1** UPLC/QTOF-MS based peak ion diagram (BPI) of different parts of EU. A, EUB; B, EUL; C, EUF; D, EUP; +, positive; -, negative.

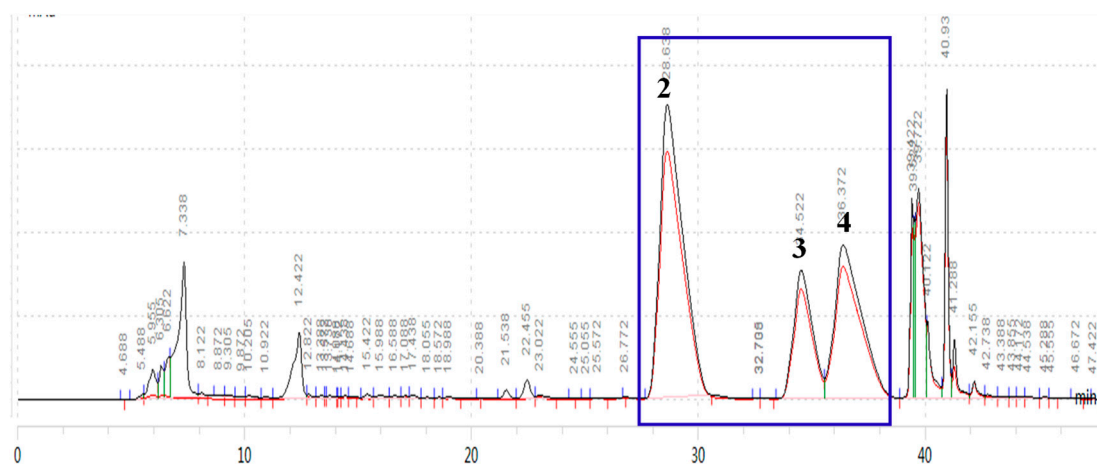

**Figure S2** Chromatogram for preparing liquid phase.

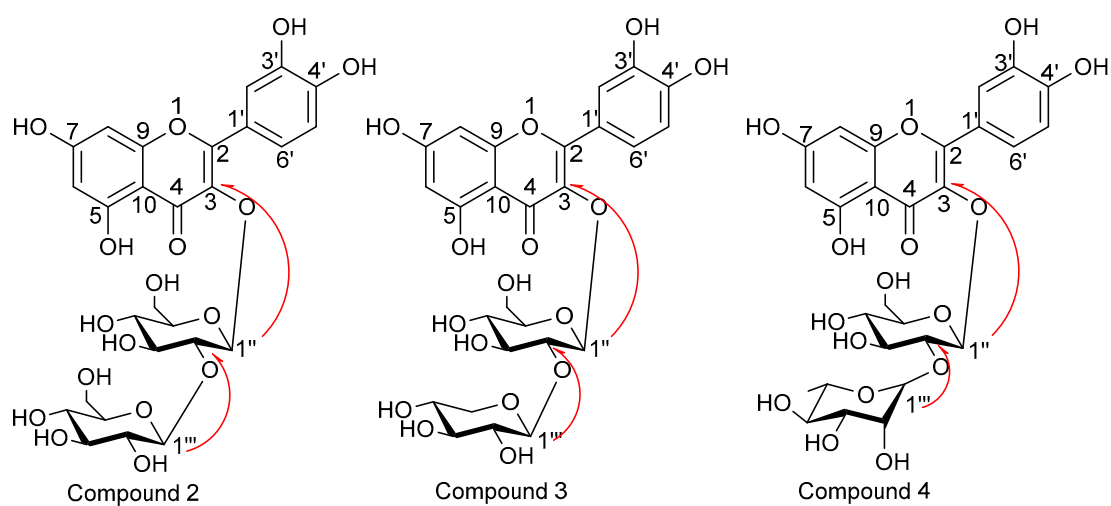

**Figure S3** Correlations and Key HMBCs of compounds **2**, **3** and **4**. (HMBC correlation signals: H→C).

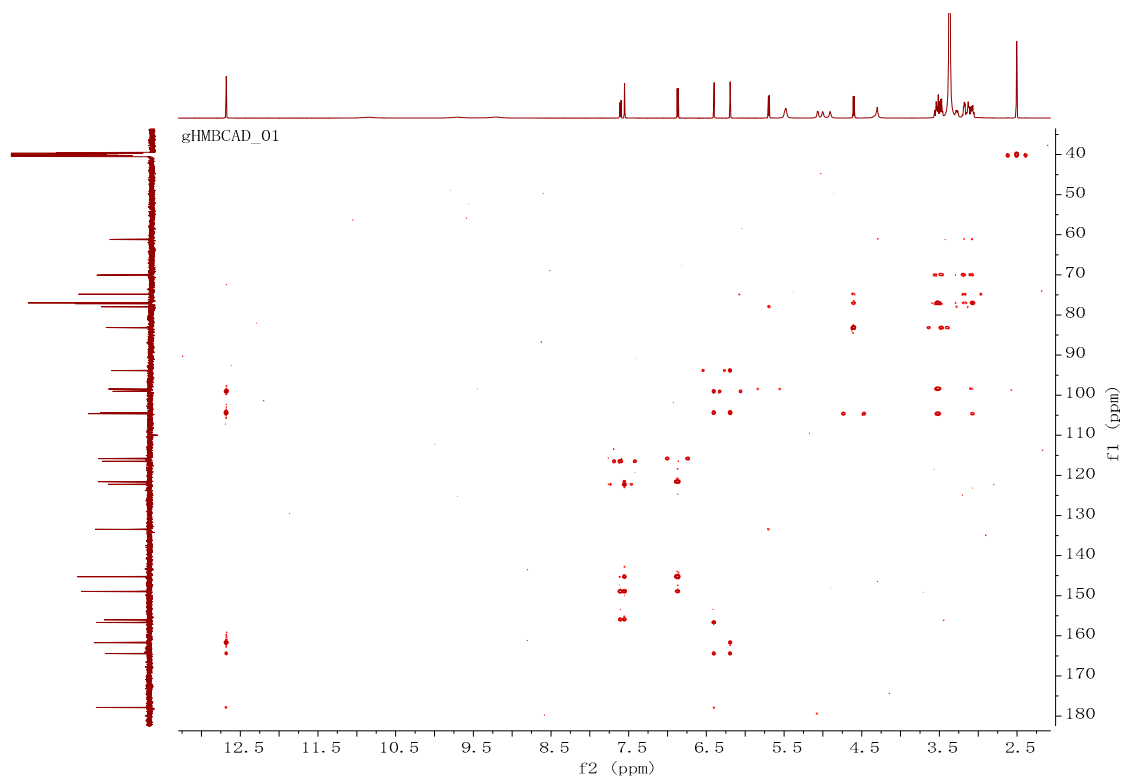

Figure S4  $^1\text{H}/^{13}\text{C}$  HMBC spectrum of the compound 2 dissolved in  $\text{DMSO}-d_6$

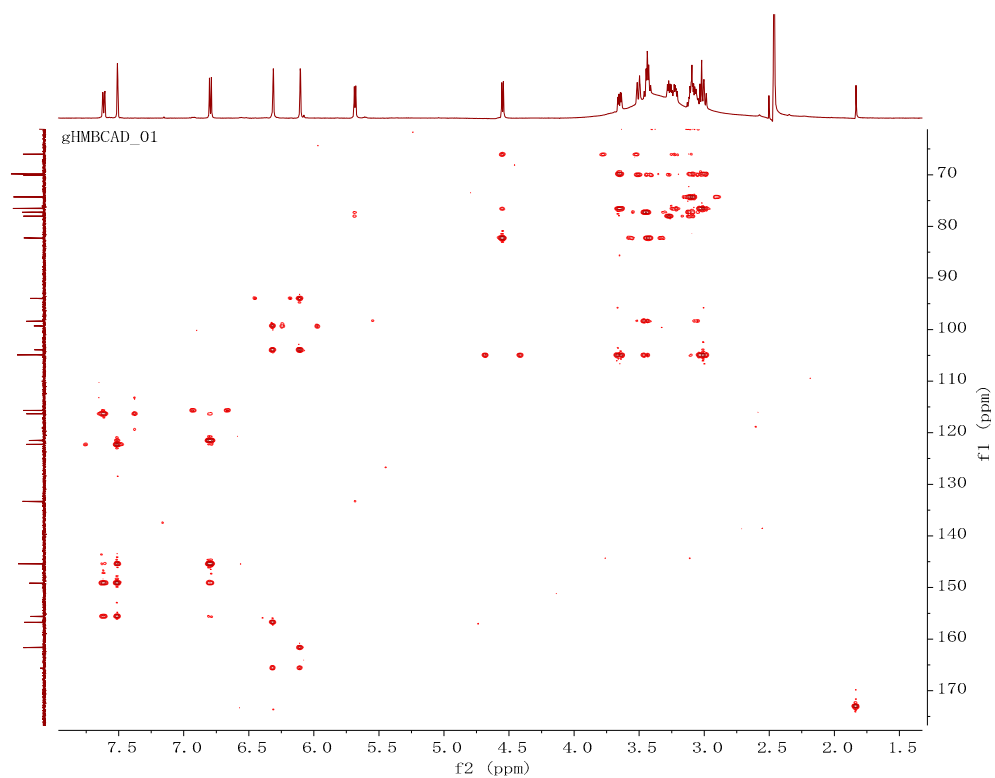

Figure S5  $^1\text{H}/^{13}\text{C}$  HMBC spectrum of the compound 3 dissolved in  $\text{DMSO}-d_6$

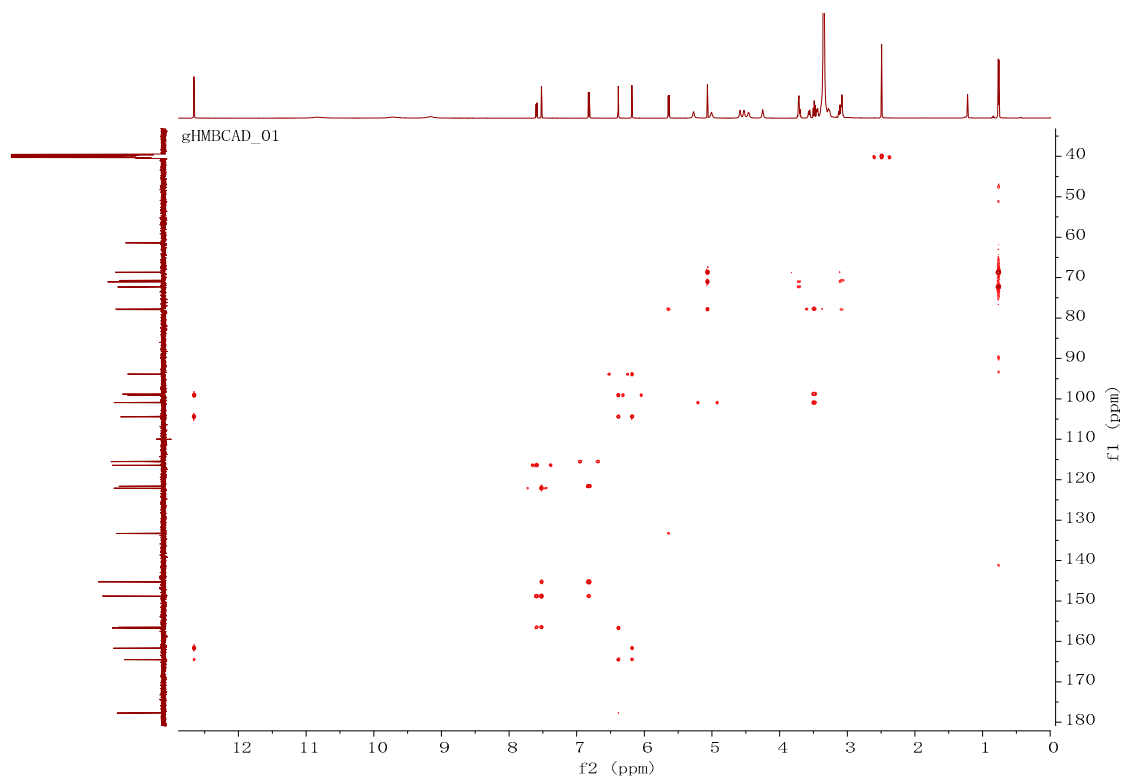

**Figure S6**  $^1\text{H}/^{13}\text{C}$  HMBC spectrum of the compound **4** dissolved in  $\text{DMSO}-d_6$

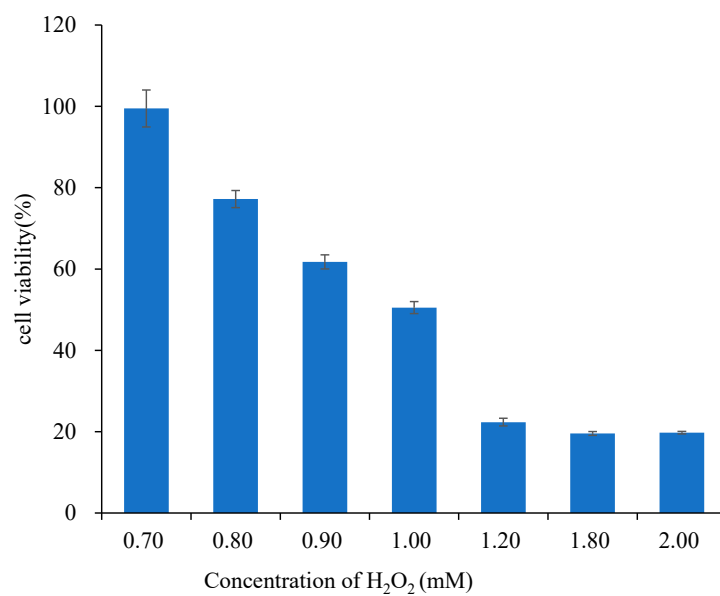

**Figure S7** Viability losses in RAW264.7 cells induced by various concentration of  $\text{H}_2\text{O}_2$
